# Supplementary material for: A New Histone Deacetylase Inhibitor Enhances Radiation Sensitivity through the Induction of Misfolded Protein Aggregation and Autophagy in Triple-Negative Breast Cancer
Source: Cancers (Basel). 2019 Nov 1;11(11):1703. doi: 10.3390/cancers11111703 (PMC6896096; doi:10.3390/cancers11111703)

# Supplementary Materials: A New Histone Deacetylase Inhibitor Enhances Radiation Sensitivity through the Induction of Misfolded Protein Aggregation and Autophagy in Triple-negative Breast Cancer

Hui-Wen Chiu, Ya-Ling Yeh, Sheng-Yow Ho, Yuan-Hua Wu, Bour-Jr Wang, Wei-Jan Huang, Yuan-Soon Ho, Ying-Jan Wang, Li-Ching Chen and Shih-Hsin Tu

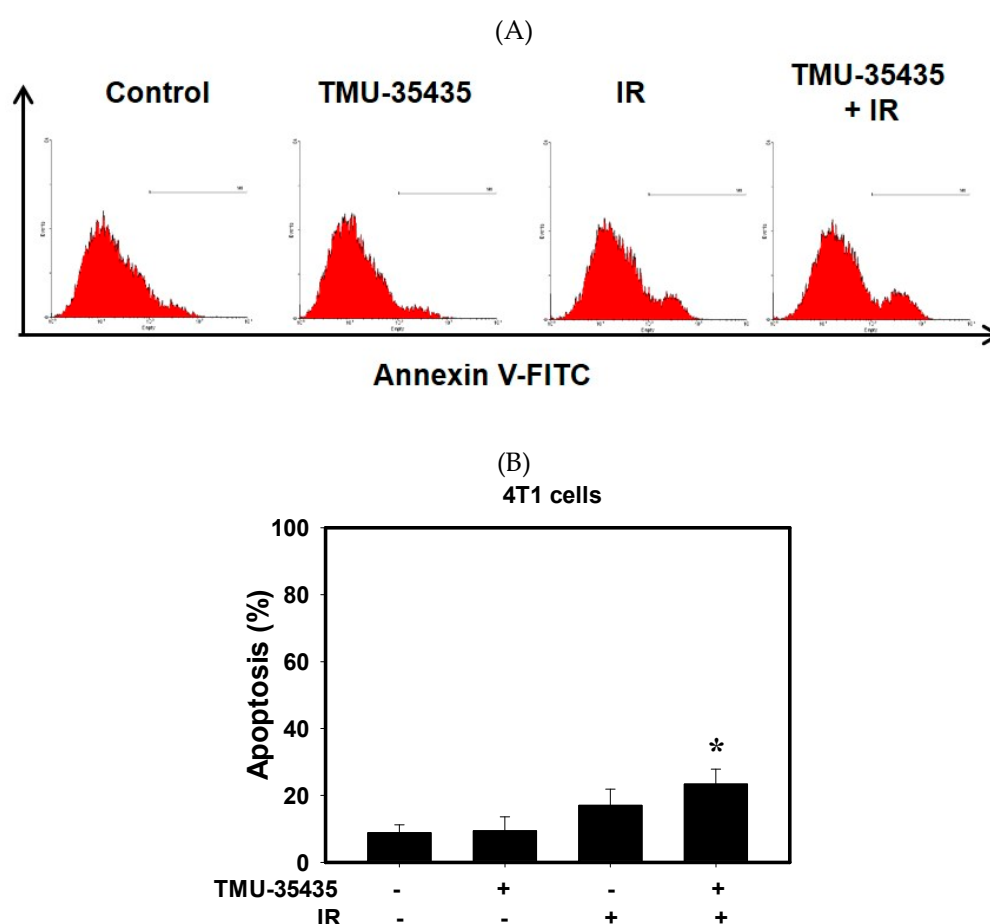

**Figure S1.** Measurement of apoptosis in 4T1 cells treated with different groups. (A) Apoptosis was analyzed by an Annexin V apoptosis kit using flow cytometry. The cells were treated with TMU-35435 (1  $\mu$ M) and IR (4 Gy) for 48 h. (B) Quantification of apoptosis and necrosis in 4T1 cells that received various treatments. The cells were treated with TMU-35435 (1  $\mu$ M) and IR (4 Gy) for 48 h. \* $p$  < 0.05, TMU-35435 versus combination treatment.

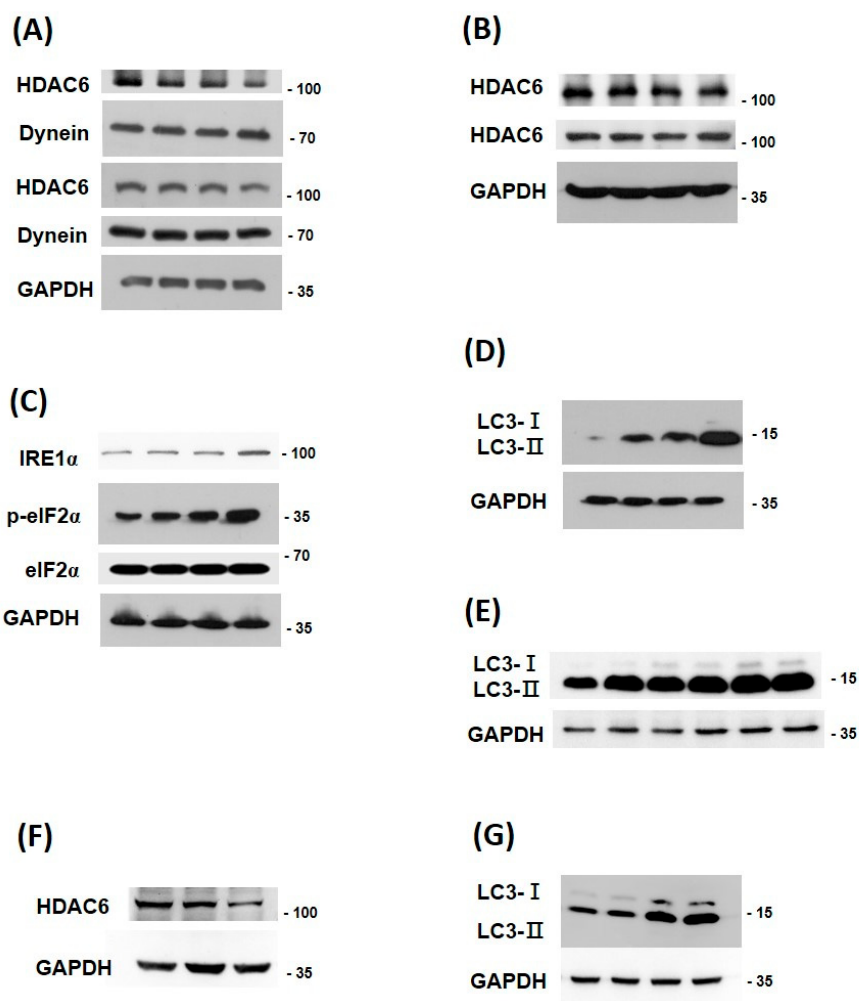

**Figure S2.** Raw data of Western blot. (A) Raw data for Figure 2B. (B) Raw data for Figure 2C. (C) Raw data for Figure 3A. (D) Raw data for Figure 4C. (E) Raw data for Figure 4F. (F) Raw data for Figure 5A. (G) Raw data for Figure 5B.

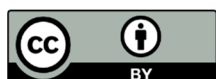

Supplement: Supplementary file 1 [file cancers-11-01703-s001.pdf]
